# Supplementary material
Source: PubMed Central journal article supplement (PMC8477300)
Supplement: jama-e2116328-s001.pdf [file jama-e2116328-s001.pdf]

## Supplemental Online Content

Young-Wolff KC, Ray GT, Alexeeff SE, et al. Rates of prenatal cannabis use among pregnant women before and during the COVID-19 pandemic. *JAMA*. doi:10.1001/jama.2021.16328

### **eAppendix.** Laboratory Methods

This supplemental material has been provided by the authors to give readers additional information about their work.

## **Laboratory Methods**

Toxicology tests were performed on a Beckman Coulter AU680 chemistry analyzer using the EMIT II Plus Cannabinoid Assay (Siemens) with a cutoff of 45 ng/mL. Confirmatory testing for the presence of the cannabis metabolite, 11-nor-9-carboxy- $\Delta$ 9-tetrahydrocannabinol, was performed by liquid chromatography-tandem mass spectrometry (LC-MS/MS) for all positive immunoassay results. The confirmation test methodology was an LC-MS/MS on a triple quadrupole system with a cutoff for positivity of 15 ng/mL.
